# Supplementary material for: Probiotic-fermented tomato with hepatic lipid metabolism modulation effects: analysis of physicochemical properties, bioactivities, and potential bioactive compounds
Source: Royal Society of Chemistry journal article supplement (doi:10.1039/d3fo05535c), 2024-01-01
Supplement: d3fo05535c3.xlsx [file d3fo05535c3.xlsx]

## Sheet: Sheet 1
Table S10 The R values of spearman's correlation analysis between phytochemicals and biological activities in FT.
	ABTS+· scavenging capacity	DPPH· scavenging capacity	·OH scavenging capacity	α-glucosidase inhibition capacity	α-amylase inhibition capacity	Pancreatic lipase inhibition capacity	E. cloacae growth inhibiton capacity	FAS	CPT-1	PPARα	p-AMPK/AMPK	p-ACC/ACC	Liver TC	Liver TG	Liver AST	Liver ALT	Total organic acid	Total sugar	Total free amino acid	TPC	TFC	Capsiate	[7]-Paradol	trans-p-Coumaric acid 4-glucoside	p-Hydroxycinnamaldehyde	Chlorogenic acid	Irisflorentin	Tiliroside	Homoeriodictyol	Cryptomeridiol 11-rhamnoside	Tuliposide B	Isopetasoside	Dibutyl phthalate	Tetrahydrofurfuryl butyrate	12-Hydroxy-8,10-octadecadienoic acid	4,8,12,15-Octadecatetraenoic acid	3,4-Dimethyl-5-pentyl-2-furanheptanoic acid	γ-Linolenic acid	8R-HpODE	9S,12S,13S-trihydroxy-10E-octadecenoic acid	18-Oxooleate	Traumatic acid	Malic acid	L-Aspartic acid	Leucyl-Isoleucine	N-Acryloylglycine
ABTS+· scavenging capacity	1	0.75	0.85	0.55	0.65	0.828459	0.716667	0.174185	0.572323	0.634533	0.489378	0.588913	-0.447905	-0.381549	-0.497673	-0.393991	0.7	-0.75	-0.45	0.733333	0.583333	0.763098	-0.820016	-0.721625	-0.564029	0.655269	0.763098	0.696742	0.497673	-0.597207	-0.597207	-0.824955	0.74347	-0.707989	0.605502	-0.576471	0.608294	0.59306	-0.696742	0.59306	0.63868	-0.795316	-0.735307	0.634533	-0.805196	0.634533
DPPH· scavenging capacity	0.75	1	0.85	0.75	0.9	0.778249	0.783333	0.0787982	0.700889	0.54744	0.435464	0.713331	-0.526704	-0.427169	-0.572323	-0.223953	0.65	-0.8	-0.05	0.866667	0.8	0.891663	-0.780497	-0.709183	-0.431316	0.899958	0.916547	0.746509	0.767245	-0.447905	-0.261278	-0.775557	0.612518	-0.787667	0.514262	-0.443758	0.570275	0.651122	-0.423022	0.439611	0.481084	-0.805196	-0.74669	0.472789	-0.795316	0.572323
·OH scavenging capacity	0.85	0.85	1	0.633333	0.7	0.786618	0.866667	0.0207364	0.659416	0.54744	0.468642	0.696742	-0.630385	-0.510114	-0.385696	-0.393991	0.866667	-0.616667	-0.183333	0.833333	0.766667	0.82116	-0.760737	-0.734067	-0.423022	0.800423	0.837749	0.77554	0.705036	-0.50182	-0.402285	-0.765677	0.616742	-0.726201	0.576471	-0.4562	0.650536	0.534998	-0.564029	0.534998	0.580618	-0.795316	-0.73986	0.534998	-0.775557	0.555734
α-glucosidase inhibition capacity	0.55	0.75	0.633333	1	0.833333	0.635989	0.8	0.0953872	0.792129	0.385696	0.646974	0.783834	-0.286162	-0.489378	-0.485231	-0.360813	0.65	-0.583333	-0.366667	0.75	0.75	0.787982	-0.820016	-0.651122	-0.580618	0.829454	0.800423	0.655269	0.721625	-0.572323	-0.360813	-0.824955	0.5745	-0.762625	0.709183	-0.609649	0.726573	0.692594	-0.497673	0.518409	0.576471	-0.795316	-0.69433	0.6843	-0.805196	0.676005
α-amylase inhibition capacity	0.65	0.9	0.7	0.833333	1	0.761513	0.816667	0.157596	0.796276	0.54744	0.530851	0.6843	-0.505967	-0.534998	-0.435464	-0.269573	0.516667	-0.866667	-0.0833333	0.833333	0.766667	0.883369	-0.760737	-0.597207	-0.522556	0.937283	0.875074	0.713331	0.829454	-0.489378	-0.240542	-0.765677	0.667434	-0.73986	0.700889	-0.481084	0.5745	0.6843	-0.427169	0.522556	0.530851	-0.795316	-0.73986	0.597207	-0.775557	0.717478
Pancreatic lipase inhibition capacity	0.828459	0.778249	0.786618	0.635989	0.761513	1	0.769881	-0.0728816	0.780874	0.668428	0.568476	0.520583	-0.5185	-0.335255	-0.374819	-0.535159	0.644357	-0.778249	-0.301258	0.937247	0.828459	0.860002	-0.843296	-0.685087	-0.570559	0.818356	0.801697	0.712157	0.585135	-0.566394	-0.460195	-0.838336	0.719015	-0.641234	0.641358	-0.495595	0.549336	0.645522	-0.5539	0.52683	0.487265	-0.808572	-0.76468	0.568476	-0.828414	0.64344
E. cloacae growth inhibiton capacity	0.716667	0.783333	0.866667	0.8	0.816667	0.769881	1	-0.0870927	0.779687	0.418874	0.696742	0.779687	-0.54744	-0.572323	-0.315193	-0.485231	0.7	-0.65	-0.216667	0.883333	0.883333	0.862633	-0.760737	-0.646974	-0.50182	0.854338	0.862633	0.725773	0.779687	-0.559882	-0.31934	-0.765677	0.637864	-0.730754	0.796276	-0.472789	0.701228	0.551587	-0.510114	0.576471	0.622091	-0.795316	-0.660183	0.659416	-0.775557	0.688447
FAS	0.174185	0.0787982	0.0207364	0.0953872	0.157596	-0.0728816	-0.0870927	1	-0.0175439	0.366357	-0.0815273	0.137255	0.0670795	-0.306502	0.0856553	0.271414	0.207364	-0.31934	-0.360813	-0.194922	-0.331782	-0.0939112	-0.240926	-0.0443756	-0.436533	0.0278638	0.00515996	0.180599	-0.00103199	-0.428277	-0.498452	-0.253218	0.434125	-0.232254	0.199174	-0.467492	0.282759	0.389061	-0.453044	0.525284	0.475748	-0.282719	-0.402197	0.329205	-0.223717	0.382869
CPT-1	0.572323	0.700889	0.659416	0.792129	0.796276	0.780874	0.779687	-0.0175439	1	0.657379	0.570691	0.659443	-0.496388	-0.405573	-0.329205	-0.320949	0.617943	-0.634533	-0.232247	0.817013	0.77554	0.799794	-0.760884	-0.642931	-0.514964	0.851393	0.77709	0.673891	0.636739	-0.514964	-0.360165	-0.778093	0.563416	-0.614058	0.750258	-0.486068	0.517166	0.578947	-0.444788	0.537668	0.47162	-0.787927	-0.662775	0.614035	-0.768259	0.535604
PPARα	0.634533	0.54744	0.54744	0.385696	0.54744	0.668428	0.418874	0.366357	0.657379	1	0.0567595	0.457172	-0.199174	-0.31063	-0.128999	-0.0670795	0.522556	-0.613796	-0.2281	0.534998	0.373254	0.510836	-0.609691	-0.325077	-0.372549	0.616099	0.531476	0.696594	0.380805	-0.386997	-0.465428	-0.636733	0.532933	-0.384069	0.442724	-0.465428	0.463557	0.675955	-0.459236	0.438596	0.434469	-0.651484	-0.654844	0.477812	-0.612149	0.401445
p-AMPK/AMPK	0.489378	0.435464	0.468642	0.646974	0.530851	0.568476	0.696742	-0.0815273	0.570691	0.0567595	1	0.556244	-0.337461	-0.27967	-0.345717	-0.484004	0.452053	-0.543293	-0.59306	0.626238	0.651122	0.558308	-0.710486	-0.69453	-0.733746	0.467492	0.486068	0.323013	0.234262	-0.75645	-0.521156	-0.708028	0.66748	-0.735283	0.79773	-0.626419	0.598104	0.47162	-0.601651	0.686275	0.605779	-0.703111	-0.517757	0.647059	-0.732612	0.744066
p-ACC/ACC	0.588913	0.713331	0.696742	0.783834	0.6843	0.520583	0.779687	0.137255	0.659443	0.457172	0.556244	1	-0.149639	-0.424149	-0.339525	0.0134159	0.655269	-0.580618	-0.402285	0.659416	0.676005	0.690402	-0.762113	-0.647059	-0.574819	0.686275	0.760578	0.805986	0.54386	-0.640867	-0.47162	-0.771947	0.509808	-0.770405	0.692466	-0.692466	0.820948	0.680083	-0.605779	0.595459	0.785346	-0.811282	-0.563075	0.737874	-0.791614	0.519092
Liver TC	-0.447905	-0.526704	-0.630385	-0.286162	-0.505967	-0.5185	-0.54744	0.0670795	-0.496388	-0.199174	-0.337461	-0.149639	1	0.593395	0.172343	0.424149	-0.489378	0.41058	-0.199069	-0.530851	-0.464494	-0.595459	0.324513	0.583075	0.147575	-0.558308	-0.479876	-0.277606	-0.547988	0.234262	0.0629515	0.34418	-0.425716	0.308162	-0.320949	0.0381837	-0.0346879	0.00928793	0.157895	-0.31063	-0.182663	0.413016	0.41126	-0.0815273	0.368764	-0.339525
Liver TG	-0.381549	-0.427169	-0.510114	-0.489378	-0.534998	-0.335255	-0.572323	-0.306502	-0.405573	-0.31063	-0.27967	-0.424149	0.593395	1	0.0278638	0.374613	-0.481084	0.360813	0.0331782	-0.377402	-0.335929	-0.514964	0.378598	0.384933	0.240454	-0.545924	-0.424149	-0.386997	-0.605779	0.384933	0.203302	0.425308	-0.476171	0.271908	-0.384933	0.298246	-0.387874	-0.267286	0.21775	-0.349845	-0.455108	0.499061	0.425989	-0.275542	0.420391	-0.55418
Liver AST	-0.497673	-0.572323	-0.385696	-0.485231	-0.435464	-0.374819	-0.315193	0.0856553	-0.329205	-0.128999	-0.345717	-0.339525	0.172343	0.0278638	1	0.0959752	-0.261278	0.389844	0.178333	-0.414727	-0.373254	-0.455108	0.480623	0.574819	0.199174	-0.415893	-0.55418	-0.145511	-0.298246	0.135191	0.25903	0.478165	-0.224946	0.566474	-0.114551	0.219814	-0.281708	-0.246646	0.221878	-0.0237358	-0.118679	0.428996	0.305896	-0.147575	0.458497	-0.277606
Liver ALT	-0.393991	-0.223953	-0.393991	-0.360813	-0.269573	-0.535159	-0.485231	0.271414	-0.320949	-0.0670795	-0.484004	0.0134159	0.424149	0.374613	0.0959752	1	-0.344224	0.149302	0.178333	-0.50182	-0.489378	-0.436533	0.355243	0.254902	0.164087	-0.337461	-0.25903	-0.0608875	-0.304438	0.246646	0.0608875	0.352785	-0.439381	0.163145	-0.320949	0.0753354	-0.178695	-0.159959	0.0856553	-0.159959	-0.0134159	0.283949	0.385202	-0.135191	0.323283	-0.49226
Total organic acid	0.7	0.65	0.866667	0.65	0.516667	0.644357	0.7	0.207364	0.617943	0.522556	0.452053	0.655269	-0.489378	-0.481084	-0.261278	-0.344224	1	-0.416667	-0.433333	0.65	0.583333	0.630385	-0.780497	-0.742362	-0.551587	0.663563	0.642827	0.738214	0.530851	-0.609649	-0.597207	-0.790376	0.578724	-0.698883	0.559882	-0.634533	0.74347	0.588913	-0.709183	0.63868	0.655269	-0.790376	-0.787667	0.609649	-0.780497	0.543293
Total sugar	-0.75	-0.8	-0.616667	-0.583333	-0.866667	-0.778249	-0.65	-0.31934	-0.634533	-0.613796	-0.543293	-0.580618	0.41058	0.360813	0.389844	0.149302	-0.416667	1	0.283333	-0.733333	-0.6	-0.758951	0.780497	0.609649	0.688447	-0.742362	-0.742362	-0.671858	-0.526704	0.63868	0.468642	0.775557	-0.798386	0.74669	-0.696742	0.609649	-0.54493	-0.717478	0.605502	-0.671858	-0.63868	0.805196	0.74669	-0.63868	0.795316	-0.754803
Total free amino acid	-0.45	-0.05	-0.183333	-0.366667	-0.0833333	-0.301258	-0.216667	-0.360813	-0.232247	-0.2281	-0.59306	-0.402285	-0.199069	0.0331782	0.178333	0.178333	-0.433333	0.283333	1	-0.166667	-0.1	-0.145155	0.632301	0.481084	0.792129	-0.0414727	-0.145155	-0.294456	0.203216	0.779687	0.858485	0.627361	-0.549154	0.498552	-0.551587	0.817013	-0.620967	-0.510114	0.808718	-0.688447	-0.692594	0.538444	0.437087	-0.700889	0.587843	-0.522556
TPC	0.733333	0.866667	0.833333	0.75	0.833333	0.937247	0.883333	-0.194922	0.817013	0.534998	0.626238	0.659416	-0.530851	-0.377402	-0.414727	-0.50182	0.65	-0.733333	-0.166667	1	0.966667	0.916547	-0.820016	-0.692594	-0.497673	0.895811	0.887516	0.725773	0.705036	-0.522556	-0.311045	-0.810136	0.642088	-0.703436	0.646974	-0.435464	0.591397	0.622091	-0.443758	0.468642	0.464494	-0.810136	-0.712542	0.530851	-0.820016	0.613796
TFC	0.583333	0.8	0.766667	0.75	0.766667	0.828459	0.883333	-0.331782	0.77554	0.373254	0.651122	0.676005	-0.464494	-0.335929	-0.373254	-0.489378	0.583333	-0.6	-0.1	0.966667	1	0.858485	-0.731098	-0.626238	-0.414727	0.841896	0.841896	0.646974	0.680153	-0.460347	-0.194922	-0.716279	0.523809	-0.65563	0.605502	-0.352518	0.566051	0.534998	-0.327634	0.381549	0.393991	-0.726158	-0.587335	0.460347	-0.736038	0.530851
Capsiate	0.763098	0.891663	0.82116	0.787982	0.883369	0.860002	0.862633	-0.0939112	0.799794	0.510836	0.558308	0.690402	-0.595459	-0.514964	-0.455108	-0.436533	0.630385	-0.758951	-0.145155	0.916547	0.858485	1	-0.795302	-0.739938	-0.484004	0.894737	0.915377	0.77709	0.78741	-0.494324	-0.23839	-0.785468	0.624383	-0.661642	0.640867	-0.473684	0.542393	0.550052	-0.428277	0.459236	0.506708	-0.780551	-0.697896	0.552116	-0.790385	0.599587
[7]-Paradol	-0.820016	-0.780497	-0.760737	-0.820016	-0.760737	-0.843296	-0.760737	-0.240926	-0.760884	-0.609691	-0.710486	-0.762113	0.324513	0.378598	0.480623	0.355243	-0.780497	0.780497	0.632301	-0.820016	-0.731098	-0.795302	1	0.822345	0.82972	-0.768259	-0.800219	-0.765801	-0.497832	0.822345	0.724007	0.991215	-0.811318	0.870405	-0.760884	0.82972	-0.811318	-0.817428	0.800219	-0.763342	-0.763342	0.956076	0.85691	-0.790385	0.973646	-0.773176
trans-p-Coumaric acid 4-glucoside	-0.721625	-0.709183	-0.734067	-0.651122	-0.597207	-0.685087	-0.646974	-0.0443756	-0.642931	-0.325077	-0.69453	-0.647059	0.583075	0.384933	0.574819	0.254902	-0.742362	0.609649	0.481084	-0.692594	-0.626238	-0.739938	0.822345	1	0.671827	-0.616099	-0.686275	-0.572755	-0.386997	0.69453	0.620227	0.827262	-0.607565	0.780601	-0.562436	0.663571	-0.550803	-0.467492	0.667699	-0.616099	-0.632611	0.822345	0.63785	-0.568627	0.837095	-0.535604
p-Hydroxycinnamaldehyde	-0.564029	-0.431316	-0.423022	-0.580618	-0.522556	-0.570559	-0.50182	-0.436533	-0.514964	-0.372549	-0.733746	-0.574819	0.147575	0.240454	0.199174	0.164087	-0.551587	0.688447	0.792129	-0.497673	-0.414727	-0.484004	0.82972	0.671827	1	-0.434469	-0.465428	-0.562436	-0.184727	0.896801	0.820433	0.810053	-0.735805	0.742081	-0.779154	0.911249	-0.718987	-0.70485	0.882353	-0.892673	-0.826625	0.785468	0.705827	-0.851393	0.800219	-0.768834
Chlorogenic acid	0.655269	0.899958	0.800423	0.829454	0.937283	0.818356	0.854338	0.0278638	0.851393	0.616099	0.467492	0.686275	-0.558308	-0.545924	-0.415893	-0.337461	0.663563	-0.742362	-0.0414727	0.895811	0.841896	0.894737	-0.768259	-0.616099	-0.434469	1	0.902993	0.772962	0.865841	-0.417957	-0.242518	-0.768259	0.590746	-0.708093	0.630547	-0.444788	0.613872	0.649123	-0.403509	0.455108	0.467492	-0.787927	-0.727353	0.529412	-0.763342	0.620227
Irisflorentin	0.763098	0.916547	0.837749	0.800423	0.875074	0.801697	0.862633	0.00515996	0.77709	0.531476	0.486068	0.760578	-0.479876	-0.424149	-0.55418	-0.25903	0.642827	-0.742362	-0.145155	0.887516	0.841896	0.915377	-0.800219	-0.686275	-0.465428	0.902993	1	0.781218	0.818369	-0.479876	-0.320949	-0.78301	0.599155	-0.72622	0.607843	-0.438596	0.607565	0.545924	-0.475748	0.4613	0.550052	-0.778093	-0.658243	0.552116	-0.768259	0.539732
Tiliroside	0.696742	0.746509	0.77554	0.655269	0.713331	0.712157	0.725773	0.180599	0.673891	0.696594	0.323013	0.805986	-0.277606	-0.386997	-0.145511	-0.0608875	0.738214	-0.671858	-0.294456	0.725773	0.646974	0.77709	-0.765801	-0.572755	-0.562436	0.772962	0.781218	1	0.657379	-0.541796	-0.424149	-0.755967	0.542393	-0.63785	0.647059	-0.661507	0.754726	0.713106	-0.655315	0.597523	0.727554	-0.765801	-0.718289	0.729618	-0.760884	0.498452
Homoeriodictyol	0.497673	0.767245	0.705036	0.721625	0.829454	0.585135	0.779687	-0.00103199	0.636739	0.380805	0.234262	0.54386	-0.547988	-0.605779	-0.298246	-0.304438	0.530851	-0.526704	0.203216	0.705036	0.680153	0.78741	-0.497832	-0.386997	-0.184727	0.865841	0.818369	0.657379	1	-0.151703	0.0299278	-0.502749	0.348982	-0.46111	0.465428	-0.159959	0.449892	0.384933	-0.203302	0.223942	0.331269	-0.527333	-0.555145	0.389061	-0.492915	0.469556
Cryptomeridiol 11-rhamnoside	-0.597207	-0.447905	-0.50182	-0.572323	-0.489378	-0.566394	-0.559882	-0.428277	-0.514964	-0.386997	-0.75645	-0.640867	0.234262	0.384933	0.135191	0.246646	-0.609649	0.63868	0.779687	-0.522556	-0.460347	-0.494324	0.822345	0.69453	0.896801	-0.417957	-0.479876	-0.541796	-0.151703	1	0.816305	0.822345	-0.864045	0.704694	-0.758514	0.847265	-0.697964	-0.653251	0.832817	-0.911249	-0.874097	0.822345	0.686567	-0.744066	0.827262	-0.744066
Tuliposide B	-0.597207	-0.261278	-0.402285	-0.360813	-0.240542	-0.460195	-0.31934	-0.498452	-0.360165	-0.465428	-0.521156	-0.47162	0.0629515	0.203302	0.25903	0.0608875	-0.597207	0.468642	0.858485	-0.311045	-0.194922	-0.23839	0.724007	0.620227	0.820433	-0.242518	-0.320949	-0.424149	0.0299278	0.816305	1	0.7363	-0.639099	0.608393	-0.54386	0.803922	-0.664327	-0.572755	0.892673	-0.760578	-0.779154	0.706798	0.572139	-0.684211	0.701882	-0.572755
Isopetasoside	-0.824955	-0.775557	-0.765677	-0.824955	-0.765677	-0.838336	-0.765677	-0.253218	-0.778093	-0.636733	-0.708028	-0.771947	0.34418	0.425308	0.478165	0.352785	-0.790376	0.775557	0.627361	-0.810136	-0.716279	-0.785468	0.991215	0.827262	0.810053	-0.768259	-0.78301	-0.755967	-0.502749	0.822345	0.7363	1	-0.811318	0.862308	-0.770718	0.817428	-0.811318	-0.82972	0.800219	-0.755967	-0.775635	0.976574	0.867706	-0.79776	0.988287	-0.785468
Dibutyl phthalate	0.74347	0.612518	0.616742	0.5745	0.667434	0.719015	0.637864	0.434125	0.563416	0.532933	0.66748	0.509808	-0.425716	-0.476171	-0.224946	-0.439381	0.578724	-0.798386	-0.549154	0.642088	0.523809	0.624383	-0.811318	-0.607565	-0.735805	0.590746	0.599155	0.542393	0.348982	-0.864045	-0.639099	-0.811318	1	-0.698158	0.735805	-0.674838	0.601713	0.664327	-0.706373	0.832511	0.725293	-0.811318	-0.795093	0.611769	-0.811318	0.838818
Tetrahydrofurfuryl butyrate	-0.707989	-0.787667	-0.726201	-0.762625	-0.73986	-0.641234	-0.730754	-0.232254	-0.614058	-0.384069	-0.735283	-0.770405	0.308162	0.271908	0.566474	0.163145	-0.698883	0.74669	0.498552	-0.703436	-0.65563	-0.661642	0.870405	0.780601	0.742081	-0.708093	-0.72622	-0.63785	-0.46111	0.704694	0.608393	0.862308	-0.698158	1	-0.722821	0.756809	-0.796247	-0.757942	0.74548	-0.735283	-0.712624	0.873104	0.752488	-0.733018	0.878502	-0.735283
12-Hydroxy-8,10-octadecadienoic acid	0.605502	0.514262	0.576471	0.709183	0.700889	0.641358	0.796276	0.199174	0.750258	0.442724	0.79773	0.692466	-0.320949	-0.384933	-0.114551	-0.320949	0.559882	-0.696742	-0.551587	0.646974	0.605502	0.640867	-0.760884	-0.562436	-0.779154	0.630547	0.607843	0.647059	0.465428	-0.758514	-0.54386	-0.770718	0.735805	-0.722821	1	-0.711042	0.71268	0.651187	-0.737874	0.847265	0.783282	-0.785468	-0.686567	0.894737	-0.780551	0.791538
4,8,12,15-Octadecatetraenoic acid	-0.576471	-0.443758	-0.4562	-0.609649	-0.481084	-0.495595	-0.472789	-0.467492	-0.486068	-0.465428	-0.626419	-0.692466	0.0381837	0.298246	0.219814	0.0753354	-0.634533	0.609649	0.817013	-0.435464	-0.352518	-0.473684	0.82972	0.663571	0.911249	-0.444788	-0.438596	-0.661507	-0.159959	0.847265	0.803922	0.817428	-0.674838	0.756809	-0.711042	1	-0.824102	-0.779154	0.872033	-0.839009	-0.849329	0.792844	0.688833	-0.843137	0.807594	-0.700722
3,4-Dimethyl-5-pentyl-2-furanheptanoic acid	0.608294	0.570275	0.650536	0.726573	0.5745	0.549336	0.701228	0.282759	0.517166	0.463557	0.598104	0.820948	-0.0346879	-0.387874	-0.281708	-0.178695	0.74347	-0.54493	-0.620967	0.591397	0.566051	0.542393	-0.811318	-0.550803	-0.718987	0.613872	0.607565	0.754726	0.449892	-0.697964	-0.664327	-0.811318	0.601713	-0.796247	0.71268	-0.824102	1	0.81359	-0.796772	0.687452	0.826204	-0.811318	-0.725854	0.809385	-0.811318	0.742112
γ-Linolenic acid	0.59306	0.651122	0.534998	0.692594	0.6843	0.645522	0.551587	0.389061	0.578947	0.675955	0.47162	0.680083	0.00928793	-0.267286	-0.246646	-0.159959	0.588913	-0.717478	-0.510114	0.622091	0.534998	0.550052	-0.817428	-0.467492	-0.70485	0.649123	0.545924	0.713106	0.384933	-0.653251	-0.572755	-0.82972	0.664327	-0.757942	0.651187	-0.779154	0.81359	1	-0.667699	0.640867	0.655315	-0.82972	-0.830451	0.752322	-0.839554	0.744066
8R-HpODE	-0.696742	-0.423022	-0.564029	-0.497673	-0.427169	-0.5539	-0.510114	-0.453044	-0.444788	-0.459236	-0.601651	-0.605779	0.157895	0.21775	0.221878	0.0856553	-0.709183	0.605502	0.808718	-0.443758	-0.327634	-0.428277	0.800219	0.667699	0.882353	-0.403509	-0.475748	-0.655315	-0.203302	0.832817	0.892673	0.800219	-0.706373	0.74548	-0.737874	0.872033	-0.796772	-0.667699	1	-0.876161	-0.902993	0.775635	0.723954	-0.861713	0.790385	-0.686275
9S,12S,13S-trihydroxy-10E-octadecenoic acid	0.59306	0.439611	0.534998	0.518409	0.522556	0.52683	0.576471	0.525284	0.537668	0.438596	0.686275	0.595459	-0.31063	-0.349845	-0.0237358	-0.159959	0.63868	-0.671858	-0.688447	0.468642	0.381549	0.459236	-0.763342	-0.616099	-0.892673	0.455108	0.4613	0.597523	0.223942	-0.911249	-0.760578	-0.755967	0.832511	-0.735283	0.847265	-0.839009	0.687452	0.640867	-0.876161	1	0.872033	-0.775635	-0.719422	0.818369	-0.760884	0.74613
18-Oxooleate	0.63868	0.481084	0.580618	0.576471	0.530851	0.487265	0.622091	0.475748	0.47162	0.434469	0.605779	0.785346	-0.182663	-0.455108	-0.118679	-0.0134159	0.655269	-0.63868	-0.692594	0.464494	0.393991	0.506708	-0.763342	-0.632611	-0.826625	0.467492	0.550052	0.727554	0.331269	-0.874097	-0.779154	-0.775635	0.725293	-0.712624	0.783282	-0.849329	0.826204	0.655315	-0.902993	0.872033	1	-0.800219	-0.654844	0.857585	-0.785468	0.698658
Traumatic acid	-0.795316	-0.805196	-0.795316	-0.795316	-0.795316	-0.808572	-0.795316	-0.282719	-0.787927	-0.651484	-0.703111	-0.811282	0.413016	0.499061	0.428996	0.283949	-0.790376	0.805196	0.538444	-0.810136	-0.726158	-0.780551	0.956076	0.822345	0.785468	-0.787927	-0.778093	-0.765801	-0.527333	0.822345	0.706798	0.976574	-0.811318	0.873104	-0.785468	0.792844	-0.811318	-0.82972	0.775635	-0.775635	-0.800219	1	0.873104	-0.778093	0.988287	-0.800219
Malic acid	-0.735307	-0.74669	-0.73986	-0.69433	-0.73986	-0.76468	-0.660183	-0.402197	-0.662775	-0.654844	-0.517757	-0.563075	0.41126	0.425989	0.305896	0.385202	-0.787667	0.74669	0.437087	-0.712542	-0.587335	-0.697896	0.85691	0.63785	0.705827	-0.727353	-0.658243	-0.718289	-0.555145	0.686567	0.572139	0.867706	-0.795093	0.752488	-0.686567	0.688833	-0.725854	-0.830451	0.723954	-0.719422	-0.654844	0.873104	1	-0.689966	0.878502	-0.824786
L-Aspartic acid	0.634533	0.472789	0.534998	0.6843	0.597207	0.568476	0.659416	0.329205	0.614035	0.477812	0.647059	0.737874	-0.0815273	-0.275542	-0.147575	-0.135191	0.609649	-0.63868	-0.700889	0.530851	0.460347	0.552116	-0.790385	-0.568627	-0.851393	0.529412	0.552116	0.729618	0.389061	-0.744066	-0.684211	-0.79776	0.611769	-0.733018	0.894737	-0.843137	0.809385	0.752322	-0.861713	0.818369	0.857585	-0.778093	-0.689966	1	-0.787927	0.713106
Leucyl-Isoleucine	-0.805196	-0.795316	-0.775557	-0.805196	-0.775557	-0.828414	-0.775557	-0.223717	-0.768259	-0.612149	-0.732612	-0.791614	0.368764	0.420391	0.458497	0.323283	-0.780497	0.795316	0.587843	-0.820016	-0.736038	-0.790385	0.973646	0.837095	0.800219	-0.763342	-0.768259	-0.760884	-0.492915	0.827262	0.701882	0.988287	-0.811318	0.878502	-0.780551	0.807594	-0.811318	-0.839554	0.790385	-0.760884	-0.785468	0.988287	0.878502	-0.787927	1	-0.795302
N-Acryloylglycine	0.634533	0.572323	0.555734	0.676005	0.717478	0.64344	0.688447	0.382869	0.535604	0.401445	0.744066	0.519092	-0.339525	-0.55418	-0.277606	-0.49226	0.543293	-0.754803	-0.522556	0.613796	0.530851	0.599587	-0.773176	-0.535604	-0.768834	0.620227	0.539732	0.498452	0.469556	-0.744066	-0.572755	-0.785468	0.838818	-0.735283	0.791538	-0.700722	0.742112	0.744066	-0.686275	0.74613	0.698658	-0.800219	-0.824786	0.713106	-0.795302	1
