# Supplementary material for: Probiotic-fermented tomato with hepatic lipid metabolism modulation effects: analysis of physicochemical properties, bioactivities, and potential bioactive compounds
Source: Royal Society of Chemistry journal article supplement (doi:10.1039/d3fo05535c), 2024-01-01
Supplement: d3fo05535c4.xlsx [file d3fo05535c4.xlsx]

## Sheet: Sheet 1
Table S11 The P values of spearman's correlation analysis between phytochemicals and biological activities in FT.
	ABTS+· scavenging capacity	DPPH· scavenging capacity	·OH scavenging capacity	α-glucosidase inhibition capacity	α-amylase inhibition capacity	Pancreatic lipase inhibition capacity	E. cloacae growth inhibiton capacity	FAS	CPT-1	PPARα	p-AMPK/AMPK	p-ACC/ACC	Liver TC	Liver TG	Liver AST	Liver ALT	Total organic acid	Total sugar	Total free amino acid	TPC	TFC	Capsiate	[7]-Paradol	trans-p-Coumaric acid 4-glucoside	p-Hydroxycinnamaldehyde	Chlorogenic acid	Irisflorentin	Tiliroside	Homoeriodictyol	Cryptomeridiol 11-rhamnoside	Tuliposide B	Isopetasoside	Dibutyl phthalate	Tetrahydrofurfuryl butyrate	12-Hydroxy-8,10-octadecadienoic acid	4,8,12,15-Octadecatetraenoic acid	3,4-Dimethyl-5-pentyl-2-furanheptanoic acid	γ-Linolenic acid	8R-HpODE	9S,12S,13S-trihydroxy-10E-octadecenoic acid	18-Oxooleate	Traumatic acid	Malic acid	L-Aspartic acid	Leucyl-Isoleucine	N-Acryloylglycine
ABTS+· scavenging capacity	0	0.000337777	7.9601e-06	0.0180406	0.00349892	2.16763e-05	0.000818489	0.489399	0.0130623	0.00467497	0.0392802	0.0101272	0.0623174	0.118205	0.0355865	0.105709	0.00121921	0.000337777	0.0609558	0.000534213	0.0110483	0.00022977	3.09483e-05	0.000723147	0.0147647	0.00315868	0.00022977	0.00131401	0.0355865	0.00887259	0.00887259	2.51849e-05	0.000405866	0.00101055	0.00774619	0.0122719	0.00739411	0.00948322	0.00131401	0.00948322	0.00433198	7.96566e-05	0.00050686	0.00467497	5.54454e-05	0.00467497
DPPH· scavenging capacity	0.000337777	0	7.9601e-06	0.000337777	3.65915e-07	0.000142636	0.000120556	0.755956	0.00119436	0.0186959	0.0708768	0.000888357	0.0247214	0.0770469	0.0130623	0.371663	0.00349892	6.72498e-05	0.843808	3.27792e-06	6.72498e-05	6.75797e-07	0.000132487	0.000982084	0.0739144	3.67097e-07	9.08119e-08	0.000372872	0.00020236	0.0623174	0.29498	0.000155655	0.00688613	0.00010409	0.0290049	0.0650799	0.0134673	0.00342409	0.0802759	0.0679325	0.0432606	5.54454e-05	0.000370982	0.047541	7.96566e-05	0.0130623
·OH scavenging capacity	7.9601e-06	7.9601e-06	0	0.00477817	0.00121921	0.00010789	3.27792e-06	0.93491	0.0029104	0.0186959	0.0497979	0.00131401	0.00503978	0.0305537	0.113929	0.105709	3.27792e-06	0.00641511	0.466501	1.74947e-05	0.000206009	2.95221e-05	0.000246724	0.000523904	0.0802759	6.6214e-05	1.43223e-05	0.000155741	0.00108391	0.0338428	0.0979222	0.000212379	0.00640676	0.000643573	0.0122719	0.0570559	0.00346296	0.0221522	0.0147647	0.0221522	0.0115202	7.96566e-05	0.000448216	0.0221522	0.000155655	0.0166386
α-glucosidase inhibition capacity	0.0180406	0.000337777	0.00477817	0	1.74947e-05	0.0045521	6.72498e-05	0.706545	8.9168e-05	0.113929	0.00370749	0.000118546	0.249651	0.0392802	0.0412337	0.141295	0.00349892	0.0110483	0.134483	0.000337777	0.000337777	0.000102972	3.09483e-05	0.00342409	0.0115202	2.07594e-05	6.6214e-05	0.00315868	0.000723147	0.0130623	0.141295	2.51849e-05	0.0126427	0.000233084	0.000982084	0.00722797	0.000637441	0.00144345	0.0355865	0.0275176	0.0122719	7.96566e-05	0.00138804	0.00173417	5.54454e-05	0.00207173
α-amylase inhibition capacity	0.00349892	3.65915e-07	0.00121921	1.74947e-05	0	0.000241041	3.54653e-05	0.532269	7.69671e-05	0.0186959	0.0234093	0.00173417	0.0321658	0.0221522	0.0708768	0.279351	0.028135	3.27792e-06	0.742349	1.74947e-05	0.000206009	1.18682e-06	0.000246724	0.00887259	0.0260904	9.87531e-09	2.00121e-06	0.000888357	2.07594e-05	0.0392802	0.336308	0.000212379	0.0024758	0.000448216	0.00119436	0.0432606	0.0126427	0.00173417	0.0770469	0.0260904	0.0234093	7.96566e-05	0.000448216	0.00887259	0.000155655	0.000802208
Pancreatic lipase inhibition capacity	2.16763e-05	0.000142636	0.00010789	0.0045521	0.000241041	1.16043e-126	0.000186416	0.773811	0.000130846	0.00242583	0.0138313	0.0267622	0.0274856	0.173829	0.125383	0.0221045	0.00389602	0.000142636	0.224426	9.92048e-09	2.16763e-05	4.73714e-06	1.1045e-05	0.00170467	0.0134108	3.31214e-05	6.31796e-05	0.000914092	0.0107438	0.0142623	0.054644	1.39404e-05	0.000772112	0.00413118	0.00412163	0.0364857	0.0182089	0.00381113	0.0170774	0.0246807	0.0402664	4.87612e-05	0.000218968	0.0138313	2.17183e-05	0.0039639
E. cloacae growth inhibiton capacity	0.000818489	0.000120556	3.27792e-06	6.72498e-05	3.54653e-05	0.000186416	0	0.731125	0.000136071	0.083603	0.00131401	0.000136071	0.0186959	0.0130623	0.202656	0.0412337	0.00121921	0.00349892	0.387823	1.18958e-06	1.18958e-06	4.10573e-06	0.000246724	0.00370749	0.0338428	6.38552e-06	4.10573e-06	0.000650703	0.000136071	0.0156795	0.196455	0.000212379	0.0043978	0.000571803	7.69671e-05	0.047541	0.001185	0.0176436	0.0305537	0.0122719	0.00583899	7.96566e-05	0.0028663	0.0029104	0.000155655	0.00158329
FAS	0.489399	0.755956	0.93491	0.706545	0.532269	0.773811	0.731125	1.05844e-05	0.947546	0.135392	0.748151	0.586062	0.792282	0.215529	0.735676	0.274858	0.409008	0.196455	0.141295	0.438285	0.17861	0.710922	0.335513	0.862851	0.0716586	0.914856	0.986878	0.471758	1	0.0776647	0.0371221	0.310662	0.071847	0.353718	0.426557	0.052219	0.255573	0.111476	0.060708	0.0270174	0.0477973	0.255643	0.0980032	0.182089	0.37218	0.117667
CPT-1	0.0130623	0.00119436	0.0029104	8.9168e-05	7.69671e-05	0.000130846	0.000136071	0.947546	1.05844e-05	0.00384122	0.0149716	0.00370123	0.0380074	0.0961333	0.182089	0.193807	0.00627552	0.00467497	0.353734	3.49742e-05	0.000155741	9.34243e-05	0.000245642	0.00494579	0.0306071	0	0.000224899	0.00283229	0.00549168	0.0306071	0.142507	0.000143367	0.014897	0.00670814	0.000506683	0.0426843	0.0279571	0.013342	0.0660107	0.0231587	0.0499704	0.000103166	0.00272129	0.00792629	0.000196096	0.0237694
PPARα	0.00467497	0.0186959	0.0186959	0.113929	0.0186959	0.00242583	0.083603	0.135392	0.00384122	1.05844e-05	0.824197	0.0581819	0.426557	0.209164	0.609109	0.792282	0.0260904	0.00673813	0.362636	0.0221522	0.127096	0.0321441	0.00722292	0.187885	0.128535	0.00767423	0.0250291	0.00180437	0.119785	0.113513	0.0533721	0.00449032	0.0227713	0.115593	0.0673898	0.0533721	0.0526744	0.00272292	0.0569495	0.0702136	0.073126	0.0034002	0.00318507	0.0467386	0.00692937	0.0998132
p-AMPK/AMPK	0.0392802	0.0708768	0.0497979	0.00370749	0.0234093	0.0138313	0.00131401	0.748151	0.0149716	0.824197	1.05844e-05	0.0182052	0.170867	0.260051	0.160135	0.0436712	0.0596433	0.0197971	0.00948322	0.00542744	0.00342409	0.0177118	0.000951797	0.00188307	0.000778523	0.052219	0.0426843	0.19083	0.347961	0.000426198	0.0284109	0.00100962	0.00247343	0.000507183	0.000102379	0.00650921	0.00874474	0.0499704	0.00958309	0.00222583	0.00900242	0.00113408	0.0277473	0.00460692	0.000544512	0.000598234
p-ACC/ACC	0.0101272	0.000888357	0.00131401	0.000118546	0.00173417	0.0267622	0.000136071	0.586062	0.00370123	0.0581819	0.0182052	1.05844e-05	0.552219	0.0808061	0.168138	0.960648	0.00315868	0.0115202	0.0979222	0.0029104	0.00207173	0.00204871	0.00023672	0.00460692	0.0141379	0.00222583	0.000378167	6.9527e-05	0.0214012	0.00512263	0.0499704	0.000174675	0.0306707	0.000183378	0.00196449	0.00196449	2.97816e-05	0.00251438	0.00900242	0.0105105	0.000168017	4.39049e-05	0.0149712	0.000701984	9.07904e-05	0.0291287
Liver TC	0.0623174	0.0247214	0.00503978	0.249651	0.0321658	0.0274856	0.0186959	0.792282	0.0380074	0.426557	0.170867	0.552219	1.05844e-05	0.0108352	0.492607	0.0808061	0.0392802	0.0905574	0.428407	0.0234093	0.0521349	0.0105105	0.188898	0.0125826	0.557797	0.0177118	0.0456981	0.263704	0.0202898	0.347961	0.805012	0.161943	0.0781673	0.213459	0.193807	0.8823	0.891313	0.97376	0.530166	0.209164	0.466618	0.0884727	0.0899717	0.748151	0.132099	0.168138
Liver TG	0.118205	0.0770469	0.0305537	0.0392802	0.0221522	0.173829	0.0130623	0.215529	0.0961333	0.209164	0.260051	0.0808061	0.0108352	1.05844e-05	0.914856	0.126306	0.0432606	0.141295	0.896018	0.122594	0.172912	0.0306071	0.121316	0.115576	0.335044	0.0208396	0.0808061	0.113513	0.00900242	0.115576	0.416843	0.0784836	0.0457586	0.275045	0.115576	0.228645	0.111728	0.282457	0.383815	0.15495	0.0594347	0.0349952	0.0779561	0.267389	0.0823745	0.0187095
Liver AST	0.0355865	0.0130623	0.113929	0.0412337	0.0708768	0.125383	0.202656	0.735676	0.182089	0.609109	0.160135	0.168138	0.492607	0.914856	1.05844e-05	0.704776	0.29498	0.109764	0.478951	0.0870296	0.127096	0.0594347	0.0434902	0.0141379	0.426557	0.0873737	0.0187095	0.5634	0.228645	0.591788	0.29805	0.044732	0.369489	0.0142455	0.650314	0.379222	0.25742	0.32242	0.37466	0.927919	0.638432	0.0756552	0.217019	0.557797	0.0556595	0.263704
Liver ALT	0.105709	0.371663	0.105709	0.141295	0.279351	0.0221045	0.0412337	0.274858	0.193807	0.792282	0.0436712	0.960648	0.0808061	0.126306	0.704776	1.05844e-05	0.161886	0.554327	0.478951	0.0338428	0.0392802	0.0716586	0.147994	0.306043	0.513905	0.170867	0.29805	0.811395	0.21876	0.32242	0.811395	0.151019	0.0680935	0.517743	0.193807	0.766979	0.478042	0.524719	0.735676	0.524719	0.960648	0.253493	0.114433	0.591788	0.190676	0.0398274
Total organic acid	0.00121921	0.00349892	3.27792e-06	0.00349892	0.028135	0.00389602	0.00121921	0.409008	0.00627552	0.0260904	0.0596433	0.00315868	0.0392802	0.0432606	0.29498	0.161886	0	0.0854146	0.0724253	0.00349892	0.0110483	0.00503978	0.000132487	0.000418498	0.0176436	0.00267837	0.00400981	0.000468721	0.0234093	0.00722797	0.00887259	9.47958e-05	0.0118588	0.00125104	0.0156795	0.00467497	0.000405866	0.0101272	0.000982084	0.00433198	0.00315868	9.47958e-05	0.00010409	0.00722797	0.000132487	0.0197971
Total sugar	0.000337777	6.72498e-05	0.00641511	0.0110483	3.27792e-06	0.000142636	0.00349892	0.196455	0.00467497	0.00673813	0.0197971	0.0115202	0.0905574	0.141295	0.109764	0.554327	0.0854146	0	0.254568	0.000534213	0.0084795	0.000260247	0.000132487	0.00722797	0.00158329	0.000418498	0.000418498	0.00225983	0.0247214	0.00433198	0.0497979	0.000155655	7.13259e-05	0.000370982	0.00131401	0.00722797	0.0193564	0.000802208	0.00774619	0.00225983	0.00433198	5.54454e-05	0.000370982	0.00433198	7.96566e-05	0.000294062
Total free amino acid	0.0609558	0.843808	0.466501	0.134483	0.742349	0.224426	0.387823	0.141295	0.353734	0.362636	0.00948322	0.0979222	0.428407	0.896018	0.478951	0.478951	0.0724253	0.254568	0	0.508618	0.692992	0.565505	0.00486848	0.0432606	8.9168e-05	0.87021	0.565505	0.235579	0.418648	0.000136071	5.13797e-06	0.00532013	0.0182551	0.0352111	0.0176436	3.49742e-05	0.0059548	0.0305537	4.84887e-05	0.00158329	0.00144345	0.0211485	0.0697134	0.00119436	0.0102989	0.0260904
TPC	0.000534213	3.27792e-06	1.74947e-05	0.000337777	1.74947e-05	9.92048e-09	1.18958e-06	0.438285	3.49742e-05	0.0221522	0.00542744	0.0029104	0.0234093	0.122594	0.0870296	0.0338428	0.00349892	0.000534213	0.508618	0	6.90271e-11	9.08119e-08	3.09483e-05	0.00144345	0.0355865	5.01255e-07	9.00469e-07	0.000650703	0.00108391	0.0260904	0.208984	4.59057e-05	0.00406575	0.00112546	0.00370749	0.0708768	0.00973737	0.00583899	0.0650799	0.0497979	0.0521349	4.59057e-05	0.000905575	0.0234093	3.09483e-05	0.00673813
TFC	0.0110483	6.72498e-05	0.000206009	0.000337777	0.000206009	2.16763e-05	1.18958e-06	0.17861	0.000155741	0.127096	0.00342409	0.00207173	0.0521349	0.172912	0.127096	0.0392802	0.0110483	0.0084795	0.692992	6.90271e-11	0	5.13797e-06	0.000566666	0.00542744	0.0870296	1.18044e-05	1.18044e-05	0.00370749	0.00189675	0.0545537	0.438285	0.000826371	0.0256709	0.0031364	0.00774619	0.15135	0.0143342	0.0221522	0.184432	0.118205	0.105709	0.000644284	0.0103811	0.0545537	0.000497036	0.0234093
Capsiate	0.00022977	6.75797e-07	2.95221e-05	0.000102972	1.18682e-06	4.73714e-06	4.10573e-06	0.710922	9.34243e-05	0.0321441	0.0177118	0.00204871	0.0105105	0.0306071	0.0594347	0.0716586	0.00503978	0.000260247	0.565505	9.08119e-08	5.13797e-06	1.05844e-05	7.96975e-05	0.000665972	0.0436712	0	0	0.000224899	0.000155542	0.0389091	0.339317	0.000112188	0.0056085	0.00278392	0.00512263	0.0488745	0.0200424	0.0197516	0.0776647	0.0569495	0.0337412	0.000132249	0.00127975	0.0192249	9.47674e-05	0.00988457
[7]-Paradol	3.09483e-05	0.000132487	0.000246724	3.09483e-05	0.000246724	1.1045e-05	0.000246724	0.335513	0.000245642	0.00722292	0.000951797	0.00023672	0.188898	0.121316	0.0434902	0.147994	0.000132487	0.000132487	0.00486848	3.09483e-05	0.000566666	7.96975e-05	0	2.81046e-05	2.05204e-05	0.000196096	6.67129e-05	0.000211575	0.0355182	2.81046e-05	0.000680755	1.73497e-15	4.38424e-05	2.64322e-06	0.000245642	2.05204e-05	4.38424e-05	3.43922e-05	6.67129e-05	0.000228072	0.000228072	6.06812e-10	5.58452e-06	9.47674e-05	1.07733e-11	0.00016799
trans-p-Coumaric acid 4-glucoside	0.000723147	0.000982084	0.000523904	0.00342409	0.00887259	0.00170467	0.00370749	0.862851	0.00494579	0.187885	0.00188307	0.00460692	0.0125826	0.115576	0.0141379	0.306043	0.000418498	0.00722797	0.0432606	0.00144345	0.00542744	0.000665972	2.81046e-05	1.05844e-05	0.00294518	0.00767423	0.00222583	0.01455	0.113513	0.00188307	0.00718954	2.28254e-05	0.00748479	0.00013203	0.0167572	0.00343361	0.017839	0.052219	0.00318184	0.00767423	0.00588196	2.81046e-05	0.00439892	0.0154029	1.47583e-05	0.0237694
p-Hydroxycinnamaldehyde	0.0147647	0.0739144	0.0802759	0.0115202	0.0260904	0.0134108	0.0338428	0.0716586	0.0306071	0.128535	0.000778523	0.0141379	0.557797	0.335044	0.426557	0.513905	0.0176436	0.00158329	8.9168e-05	0.0355865	0.0870296	0.0436712	2.05204e-05	0.00294518	1.05844e-05	0.073126	0.0533721	0.0167572	0.461507	0	2.86008e-05	4.60543e-05	0.000500152	0.000421746	0.000209577	0	0.000772655	0.00151541	0	0	1.63e-05	0.000112188	0.00106385	0	6.67129e-05	0.000294298
Chlorogenic acid	0.00315868	3.67097e-07	6.6214e-05	2.07594e-05	9.87531e-09	3.31214e-05	6.38552e-06	0.914856	0	0.00767423	0.052219	0.00222583	0.0177118	0.0208396	0.0873737	0.170867	0.00267837	0.000418498	0.87021	5.01255e-07	1.18044e-05	0	0.000196096	0.00767423	0.073126	1.05844e-05	0	0.000257917	0	0.0856957	0.330804	0.000196096	0.00983826	0.00100806	0.00608535	0.0660107	0.00672949	0.00444468	0.0979605	0.0594347	0.052219	0.000103166	0.000624747	0.0256785	0.000228072	0.00718954
Irisflorentin	0.00022977	9.08119e-08	1.43223e-05	6.6214e-05	2.00121e-06	6.31796e-05	4.10573e-06	0.986878	0.000224899	0.0250291	0.0426843	0.000378167	0.0456981	0.0808061	0.0187095	0.29805	0.00400981	0.000418498	0.565505	9.00469e-07	1.18044e-05	0	6.67129e-05	0.00222583	0.0533721	0	1.05844e-05	0.000195008	3.33357e-05	0.0456981	0.193807	0.000121869	0.00859685	0.000643266	0.00872294	0.0702136	0.00748479	0.0208396	0.0477973	0.0557372	0.0197516	0.000143367	0.00297895	0.0192249	0.000196096	0.0225606
Tiliroside	0.00131401	0.000372872	0.000155741	0.00315868	0.000888357	0.000914092	0.000650703	0.471758	0.00283229	0.00180437	0.19083	6.9527e-05	0.263704	0.113513	0.5634	0.811395	0.000468721	0.00225983	0.235579	0.000650703	0.00370749	0.000224899	0.000211575	0.01455	0.0167572	0.000257917	0.000195008	1.05844e-05	0.00384122	0.0219748	0.0808061	0.000284221	0.0200424	0.00439892	0.00460692	0.00356539	0.00029473	0.00126456	0.00398546	0.0101937	0.000905343	0.000211575	0.000786201	0.000861403	0.000245642	0.0371221
Homoeriodictyol	0.0355865	0.00020236	0.00108391	0.000723147	2.07594e-05	0.0107438	0.000136071	1	0.00549168	0.119785	0.347961	0.0214012	0.0202898	0.00900242	0.228645	0.21876	0.0234093	0.0247214	0.418648	0.00108391	0.00189675	0.000155542	0.0355182	0.113513	0.461507	0	3.33357e-05	0.00384122	1.05844e-05	0.546667	0.908332	0.0334615	0.155783	0.0541026	0.0533721	0.524719	0.0610254	0.115576	0.416843	0.370131	0.179237	0.0245186	0.0167787	0.111476	0.0376709	0.0510851
Cryptomeridiol 11-rhamnoside	0.00887259	0.0623174	0.0338428	0.0130623	0.0392802	0.0142623	0.0156795	0.0776647	0.0306071	0.113513	0.000426198	0.00512263	0.347961	0.115576	0.591788	0.32242	0.00722797	0.00433198	0.000136071	0.0260904	0.0545537	0.0389091	2.81046e-05	0.00188307	0	0.0856957	0.0456981	0.0219748	0.546667	1.05844e-05	3.84135e-05	2.81046e-05	3.79748e-06	0.00109269	0.000401645	0	0.00127777	0.00413405	6.55465e-06	0	0	2.81046e-05	0.0016503	0.000598234	2.28254e-05	0.000598234
Tuliposide B	0.00887259	0.29498	0.0979222	0.141295	0.336308	0.054644	0.196455	0.0371221	0.142507	0.0533721	0.0284109	0.0499704	0.805012	0.416843	0.29805	0.811395	0.00887259	0.0497979	5.13797e-06	0.208984	0.438285	0.339317	0.000680755	0.00718954	2.86008e-05	0.330804	0.193807	0.0808061	0.908332	3.84135e-05	1.05844e-05	0.000493559	0.00429847	0.00738183	0.0214012	7.70189e-05	0.00263738	0.01455	0	0.000378167	0.000209577	0.00103962	0.0130984	0.00231889	0.00116711	0.01455
Isopetasoside	2.51849e-05	0.000155655	0.000212379	2.51849e-05	0.000212379	1.39404e-05	0.000212379	0.310662	0.000143367	0.00449032	0.00100962	0.000174675	0.161943	0.0784836	0.044732	0.151019	9.47958e-05	0.000155655	0.00532013	4.59057e-05	0.000826371	0.000112188	1.73497e-15	2.28254e-05	4.60543e-05	0.000196096	0.000121869	0.000284221	0.0334615	2.81046e-05	0.000493559	0	4.38424e-05	4.17947e-06	0.000181584	3.43922e-05	4.38424e-05	2.05204e-05	6.67129e-05	0.000284221	0.000155266	4.23768e-12	3.08954e-06	7.29602e-05	1.71723e-14	0.000112188
Dibutyl phthalate	0.000405866	0.00688613	0.00640676	0.0126427	0.0024758	0.000772112	0.0043978	0.071847	0.014897	0.0227713	0.00247343	0.0306707	0.0781673	0.0457586	0.369489	0.0680935	0.0118588	7.13259e-05	0.0182551	0.00406575	0.0256709	0.0056085	4.38424e-05	0.00748479	0.000500152	0.00983826	0.00859685	0.0200424	0.155783	3.79748e-06	0.00429847	4.38424e-05	0	0.00127207	0.000500152	0.00212331	0.00824542	0.00263738	0.00105017	1.81476e-05	0.000658748	4.38424e-05	8.02946e-05	0.00697406	4.38424e-05	1.36332e-05
Tetrahydrofurfuryl butyrate	0.00101055	0.00010409	0.000643573	0.000233084	0.000448216	0.00413118	0.000571803	0.353718	0.00670814	0.115593	0.000507183	0.000183378	0.213459	0.275045	0.0142455	0.517743	0.00125104	0.000370982	0.0352111	0.00112546	0.0031364	0.00278392	2.64322e-06	0.00013203	0.000421746	0.00100806	0.000643266	0.00439892	0.0541026	0.00109269	0.00738183	4.17947e-06	0.00127207	1.16043e-126	0.000701601	0.000277271	7.70486e-05	0.00026815	0.000383782	0.000507183	0.000903769	2.25352e-06	0.000314502	0.000538701	1.62001e-06	0.000507183
12-Hydroxy-8,10-octadecadienoic acid	0.00774619	0.0290049	0.0122719	0.000982084	0.00119436	0.00412163	7.69671e-05	0.426557	0.000506683	0.0673898	0.000102379	0.00196449	0.193807	0.115576	0.650314	0.193807	0.0156795	0.00131401	0.0176436	0.00370749	0.00774619	0.00512263	0.000245642	0.0167572	0.000209577	0.00608535	0.00872294	0.00460692	0.0533721	0.000401645	0.0214012	0.000181584	0.000500152	0.000701601	1.05844e-05	0.00132392	0.000902556	0.00428709	0.000701984	0	0.000181163	0.000112188	0.0016503	0	0.000132249	0.000132507
4,8,12,15-Octadecatetraenoic acid	0.0122719	0.0650799	0.0570559	0.00722797	0.0432606	0.0364857	0.047541	0.052219	0.0426843	0.0533721	0.00650921	0.00196449	0.8823	0.228645	0.379222	0.766979	0.00467497	0.00722797	3.49742e-05	0.0708768	0.15135	0.0488745	2.05204e-05	0.00343361	0	0.0660107	0.0702136	0.00356539	0.524719	0	7.70189e-05	3.43922e-05	0.00212331	0.000277271	0.00132392	1.05844e-05	2.61099e-05	0.000209577	0	0	0	8.69558e-05	0.00156984	0	5.0623e-05	0.00165486
3,4-Dimethyl-5-pentyl-2-furanheptanoic acid	0.00739411	0.0134673	0.00346296	0.000637441	0.0126427	0.0182089	0.001185	0.255573	0.0279571	0.0526744	0.00874474	2.97816e-05	0.891313	0.111728	0.25742	0.478042	0.000405866	0.0193564	0.0059548	0.00973737	0.0143342	0.0200424	4.38424e-05	0.017839	0.000772655	0.00672949	0.00748479	0.00029473	0.0610254	0.00127777	0.00263738	4.38424e-05	0.00824542	7.70486e-05	0.000902556	2.61099e-05	0	4.00987e-05	7.56091e-05	0.00161846	2.3883e-05	4.38424e-05	0.000649346	4.72578e-05	4.38424e-05	0.000421389
γ-Linolenic acid	0.00948322	0.00342409	0.0221522	0.00144345	0.00173417	0.00381113	0.0176436	0.111476	0.013342	0.00272292	0.0499704	0.00251438	0.97376	0.282457	0.32242	0.524719	0.0101272	0.000802208	0.0305537	0.00583899	0.0221522	0.0197516	3.43922e-05	0.052219	0.00151541	0.00444468	0.0208396	0.00126456	0.115576	0.00413405	0.01455	2.05204e-05	0.00263738	0.00026815	0.00428709	0.000209577	4.00987e-05	1.05844e-05	0.00318184	0.00512263	0.00398546	2.05204e-05	1.98745e-05	0.000478678	1.31753e-05	0.000598234
8R-HpODE	0.00131401	0.0802759	0.0147647	0.0355865	0.0770469	0.0170774	0.0305537	0.060708	0.0660107	0.0569495	0.00958309	0.00900242	0.530166	0.383815	0.37466	0.735676	0.000982084	0.00774619	4.84887e-05	0.0650799	0.184432	0.0776647	6.67129e-05	0.00318184	0	0.0979605	0.0477973	0.00398546	0.416843	6.55465e-06	0	6.67129e-05	0.00105017	0.000383782	0.000701984	0	7.56091e-05	0.00318184	1.05844e-05	0	0	0.000155266	0.000681684	0	9.47674e-05	0.00222583
9S,12S,13S-trihydroxy-10E-octadecenoic acid	0.00948322	0.0679325	0.0221522	0.0275176	0.0260904	0.0246807	0.0122719	0.0270174	0.0231587	0.0702136	0.00222583	0.0105105	0.209164	0.15495	0.927919	0.524719	0.00433198	0.00225983	0.00158329	0.0497979	0.118205	0.0569495	0.000228072	0.00767423	0	0.0594347	0.0557372	0.0101937	0.370131	0	0.000378167	0.000284221	1.81476e-05	0.000507183	0	0	0.00161846	0.00512263	0	1.05844e-05	0	0.000155266	0.000764293	3.33357e-05	0.000245642	0.000566419
18-Oxooleate	0.00433198	0.0432606	0.0115202	0.0122719	0.0234093	0.0402664	0.00583899	0.0477973	0.0499704	0.073126	0.00900242	0.000168017	0.466618	0.0594347	0.638432	0.960648	0.00315868	0.00433198	0.00144345	0.0521349	0.105709	0.0337412	0.000228072	0.00588196	1.63e-05	0.052219	0.0197516	0.000905343	0.179237	0	0.000209577	0.000155266	0.000658748	0.000903769	0.000181163	0	2.3883e-05	0.00398546	0	0	1.05844e-05	6.67129e-05	0.00318507	0	0.000112188	0.00172833
Traumatic acid	7.96566e-05	5.54454e-05	7.96566e-05	7.96566e-05	7.96566e-05	4.87612e-05	7.96566e-05	0.255643	0.000103166	0.0034002	0.00113408	4.39049e-05	0.0884727	0.0349952	0.0756552	0.253493	9.47958e-05	5.54454e-05	0.0211485	4.59057e-05	0.000644284	0.000132249	6.06812e-10	2.81046e-05	0.000112188	0.000103166	0.000143367	0.000211575	0.0245186	2.81046e-05	0.00103962	4.23768e-12	4.38424e-05	2.25352e-06	0.000112188	8.69558e-05	4.38424e-05	2.05204e-05	0.000155266	0.000155266	6.67129e-05	0	2.25352e-06	0.000143367	1.71723e-14	6.67129e-05
Malic acid	0.00050686	0.000370982	0.000448216	0.00138804	0.000448216	0.000218968	0.0028663	0.0980032	0.00272129	0.00318507	0.0277473	0.0149712	0.0899717	0.0779561	0.217019	0.114433	0.00010409	0.000370982	0.0697134	0.000905575	0.0103811	0.00127975	5.58452e-06	0.00439892	0.00106385	0.000624747	0.00297895	0.000786201	0.0167787	0.0016503	0.0130984	3.08954e-06	8.02946e-05	0.000314502	0.0016503	0.00156984	0.000649346	1.98745e-05	0.000681684	0.000764293	0.00318507	2.25352e-06	1.16043e-126	0.00153085	1.62001e-06	2.53658e-05
L-Aspartic acid	0.00467497	0.047541	0.0221522	0.00173417	0.00887259	0.0138313	0.0029104	0.182089	0.00792629	0.0467386	0.00460692	0.000701984	0.748151	0.267389	0.557797	0.591788	0.00722797	0.00433198	0.00119436	0.0234093	0.0545537	0.0192249	9.47674e-05	0.0154029	0	0.0256785	0.0192249	0.000861403	0.111476	0.000598234	0.00231889	7.29602e-05	0.00697406	0.000538701	0	0	4.72578e-05	0.000478678	0	3.33357e-05	0	0.000143367	0.00153085	1.05844e-05	0.000103166	0.00126456
Leucyl-Isoleucine	5.54454e-05	7.96566e-05	0.000155655	5.54454e-05	0.000155655	2.17183e-05	0.000155655	0.37218	0.000196096	0.00692937	0.000544512	9.07904e-05	0.132099	0.0823745	0.0556595	0.190676	0.000132487	7.96566e-05	0.0102989	3.09483e-05	0.000497036	9.47674e-05	1.07733e-11	1.47583e-05	6.67129e-05	0.000228072	0.000196096	0.000245642	0.0376709	2.28254e-05	0.00116711	1.71723e-14	4.38424e-05	1.62001e-06	0.000132249	5.0623e-05	4.38424e-05	1.31753e-05	9.47674e-05	0.000245642	0.000112188	1.71723e-14	1.62001e-06	0.000103166	0	7.96975e-05
N-Acryloylglycine	0.00467497	0.0130623	0.0166386	0.00207173	0.000802208	0.0039639	0.00158329	0.117667	0.0237694	0.0998132	0.000598234	0.0291287	0.168138	0.0187095	0.263704	0.0398274	0.0197971	0.000294062	0.0260904	0.00673813	0.0234093	0.00988457	0.00016799	0.0237694	0.000294298	0.00718954	0.0225606	0.0371221	0.0510851	0.000598234	0.01455	0.000112188	1.36332e-05	0.000507183	0.000132507	0.00165486	0.000421389	0.000598234	0.00222583	0.000566419	0.00172833	6.67129e-05	2.53658e-05	0.00126456	7.96975e-05	1.05844e-05
