# Supplementary material for: Probiotic-fermented tomato with hepatic lipid metabolism modulation effects: analysis of physicochemical properties, bioactivities, and potential bioactive compounds
Source: Royal Society of Chemistry journal article supplement (doi:10.1039/d3fo05535c), 2024-01-01
Supplement: d3fo05535c5.pdf [file d3fo05535c5.pdf]

## Supplementary Material

### **Probiotic-fermented tomato with hepatic lipid metabolism modulation effects: analysis of physicochemical properties, bioactivities, and potential bioactive compounds**

Benliang Wei<sup>a,b</sup>, Wendi Zheng<sup>a,b</sup>, Zhen Peng<sup>a,b</sup>, Muyan Xiao<sup>a,b,c</sup>, Tao Huang<sup>a,b,c</sup>,  
Mingyong Xie<sup>a,b</sup>, Tao Xiong<sup>a,b,\*</sup>

a State Key Laboratory of Food Science and Resources, No. 235 Nanjing East Road,  
Nanchang, Jiangxi, 330047, PR China

b School of Food Science and Technology, Nanchang University, No. 235 Nanjing East  
Road, Nanchang, Jiangxi, 330047, PR China

c International Institute of Food Innovation, Nanchang University, No. 235 Nanjing  
East Road, Nanchang, Jiangxi, 330047, PR China

\* Corresponding author: Tao Xiong

\* Email: xiongtao0907@163.com

Address: State Key Laboratory of Food Science and Resources, No. 235 Nanjing East  
Road, Nanchang, Jiangxi, 330047, PR China

Tel.: +86 13697084048

Fax: +86 0791 3063627

**Table S1** The ingredients and energy of the normal chow diet and high-fat diet.

| Ingredient               | Normal chow diet (g/kg)   | High-fat diet (g/kg)   |
|--------------------------|---------------------------|------------------------|
| Casein                   | 190                       | 267                    |
| L-Cystine                | 3                         | 4                      |
| Maltodextrin             | 33                        | 157                    |
| Sucrose                  | 332                       | 89                     |
| Soybean Oil              | 23                        | 33                     |
| Lard                     | 19                        | 301                    |
| Corn Starch              | 299                       | 0                      |
| Cellulose                | 62                        | 67                     |
| Mineral Mix, M1020       | 27                        | 66                     |
| Vitamin Mix, V1010       | 10                        | 13                     |
| Choline Bitartrate       | 2                         | 3                      |
| t-Butylhydroquinone      | 0.014                     | 0.067                  |
| Calorie sources (kcal %) | Normal chow diet (kcal %) | High-fat diet (kcal %) |
| Proteins                 | 20                        | 20                     |
| Carbohydrates            | 70                        | 20                     |
| Carbohydrates            | 10                        | 60                     |
| Total calorie (kcal/g)   | 3.85                      | 5                      |

**Table S2** Metabolite elution procedures and instrument parameters for non-targeted metabolomics analysis based on UPLC-QTOF/MS.

| Item                   | Information and parameters                                                                                                                                                                                                                                                        |
|------------------------|-----------------------------------------------------------------------------------------------------------------------------------------------------------------------------------------------------------------------------------------------------------------------------------|
| Chromatographic column | ZORBAX Eclipse Plus C18 column (2.1×100 mm, 1.8 µm-Micron)                                                                                                                                                                                                                        |
| Mobile phase           | (A) water with 0.1% (v/v) formic acid and (B) acetonitrile with 0.1% (v/v) formic acid for positive and negative ion modes                                                                                                                                                        |
| UHPLC                  | Injection volume, 5 µL; column temperature, 35°C; flow rate, 0.3 mL/min                                                                                                                                                                                                           |
| MS                     | Drying gas (N <sub>2</sub> ) flow rate, 10 L/min; gas temperature, 325°C; fragmentor 175 V; capillary voltage 3500 V; nebulizer, 25 psi; acquisition range 50-1200 m/z                                                                                                            |
| Elution procedures     | Positive and negative ion mode: 0-5 min, 0-15% B; 5-6 min, 15-25% B; 6-11.5 min, 25-42% B; 11.5-12.5 min, 42-44% B; 12.5-14 min, 44-50% B; 14-15 min, 50% B; 15-17 min, 50-60% B; 17-19 min, 60-70% B; 19-26 min, 70% B; 26-28 min, 70-98% B; 28-29 min, 98-10%; 29-32 min, 10% B |

**Table S3** The elution procedure and instrument parameters for quantification analysis based on UPLC-QQQ-MS.

| Item                   | Information and parameters                                                                                                              |
|------------------------|-----------------------------------------------------------------------------------------------------------------------------------------|
| Chromatographic column | Zorbax Eclipse XDB-C18 column (4.6×250 mm, 5 μm-Micron)                                                                                 |
| Mobile phase           | (A) water with 0.1% (v/v) formic acid and (B) acetonitrile with 0.1% (v/v) formic acid for positive and negative ion modes              |
| HPLC                   | Injection volume, 5 μL; column temperature, 30°C; flow rate, 0.3 mL/min                                                                 |
| MS                     | Drying gas (N <sub>2</sub> ) flow rate, 12 L/min; gas temperature, 350°C; fragmentor 175 V; capillary voltage 4000 V; nebulizer, 35 psi |
| Elution procedures     | Positive and negative ion mode: 0-2 min, 10-50% B; 2-5 min, 50-80%; 5-22 min, 80%; 22-26 min, 80-98%; 26-28 min, 98%                    |

**Table S4** The optimized mass spectrometry parameters and standard curve information for quantification analysis based on UPLC-QQQ-MS.

| Componds         | Retention<br>time (min) | Calibration<br>curve equation | R <sup>2</sup> | Precursor<br>ion (m/z) | Product<br>ion (m/z) | Fragmentor<br>voltage (V) | Collision<br>energy (eV) | LOD<br>(ng/mL) | LOQ<br>(ng/mL) |
|------------------|-------------------------|-------------------------------|----------------|------------------------|----------------------|---------------------------|--------------------------|----------------|----------------|
| Chlorogenic acid | 11.340                  | Y=27.618X-580.43              | 0.9995         | 353.3                  | 191.0                | 100                       | 10                       | 7.663          | 30.966         |
| Capsiate         | 12.231                  | Y=4440X-1800.2                | 0.9933         | 307.4                  | 156.9                | 130                       | 30                       | 7.369          | 28.746         |
| Tiliroside       | 11.316                  | Y=2646X-1042.7                | 0.9966         | 593.5                  | 284.8                | 105                       | 40                       | 8.660          | 34.259         |
| Irisflorentin    | 15.570                  | Y=2376.3X+177.3               | 0.9986         | 387.4                  | 270.9                | 125                       | 45                       | 13.56          | 56.023         |
| Homoeriodictyol  | 13.337                  | Y=676.35X+24.345              | 0.9964         | 301.3                  | 133.9                | 130                       | 35                       | 10.264         | 37.659         |

Note: X indicats concentration, Y indicats peak area.

**Table S5** The gene primers used for real-time quantitative PCR.

| Gene                           | Forward primer        | Reverse primer           |
|--------------------------------|-----------------------|--------------------------|
| <i>AMPK</i>                    | GACAAGCCCACCTGATTC    | TTCCTTCGTACACGCAA        |
| <i>ACC</i>                     | CAACTTTGTGCCACGGTTA   | TTTGTCAGGAAGAGGGCGGAT    |
| <i>CPT-1</i>                   | GGACTCCGCTCGCTCATT    | GAGATCGATGCCATCAGGGG     |
| <i>SREBP-1c</i>                | CAGACTCACTGCTGCTGACA  | GATGGTCCCTCCACTCACCA     |
| <i>FAS</i>                     | TGCCCAAGTGACTGACATCA  | CATCCCCATTGACTGTGCAG     |
| <i>PPAR<math>\alpha</math></i> | TGCCTTCCCTGTGAACTGAC  | TGGGGAGAGAGGACAGATG<br>G |
| <i>GAPDH</i>                   | TCAAGAAGGTGGTGAAGCAGG | TCAAAGGTGGAGGAGTGGGT     |

**Table S6** Contents of organic acids and sugars in UFT, LFT, and SFT.

| Organic acid    | UFT                         | LFT                         | SFT                         |
|-----------------|-----------------------------|-----------------------------|-----------------------------|
| Citric acid     | 6.694 ± 0.147 <sup>a</sup>  | 6.634 ± 0.352 <sup>a</sup>  | 6.694 ± 0.718 <sup>a</sup>  |
| Isovaleric acid | 2.102 ± 0.008 <sup>a</sup>  | 2.164 ± 0.058 <sup>a</sup>  | 2.138 ± 0.152 <sup>a</sup>  |
| Butyric acid    | 0 <sup>c</sup>              | 0.502 ± 0.043 <sup>a</sup>  | 0.377 ± 0.033 <sup>b</sup>  |
| Acetic acid     | 1.154 ± 0.027 <sup>a</sup>  | 1.364 ± 0.114 <sup>a</sup>  | 1.284 ± 0.095 <sup>a</sup>  |
| Lactic acid     | 1.838 ± 0.042 <sup>b</sup>  | 11.182 ± 0.278 <sup>a</sup> | 11.080 ± 0.437 <sup>a</sup> |
| Malic acid      | 0.679 ± 0.014 <sup>a</sup>  | 0.139 ± 0.018 <sup>b</sup>  | 0.012 ± 0.006 <sup>c</sup>  |
| Total           | 12.467 ± 0.238 <sup>b</sup> | 21.984 ± 0.686 <sup>a</sup> | 21.585 ± 1.413 <sup>a</sup> |
| Sugar           | UFT                         | LFT                         | SFT                         |
| Fructose        | 15.918 ± 0.801 <sup>a</sup> | 0 <sup>b</sup>              | 0 <sup>b</sup>              |
| Glucose         | 16.074 ± 0.773 <sup>a</sup> | 1.249 ± 0.035 <sup>b</sup>  | 1.244 ± 0.235 <sup>b</sup>  |
| Sucrose         | 0.538 ± 0.004 <sup>a</sup>  | 0.566 ± 0.026 <sup>a</sup>  | 0.555 ± 0.069 <sup>a</sup>  |
| Total           | 32.531 ± 0.24 <sup>a</sup>  | 1.815 ± 0.058 <sup>b</sup>  | 1.799 ± 0.276 <sup>b</sup>  |

Note: unit: mg/mL; different lowercase letters represented statistically significant differences between groups ( $P < 0.05$ ).

**Table S7** Contents of free amino acids in UFT, LFT, and SFT.

| Taste                | Free amino acid | UFT                         | LFT                         | SFT                         |
|----------------------|-----------------|-----------------------------|-----------------------------|-----------------------------|
| Umami amino acid     | Asp             | 1.801 ± 0.092 <sup>a</sup>  | 1.822 ± 0.019 <sup>a</sup>  | 1.834 ± 0.022 <sup>a</sup>  |
|                      | Glu             | 9.216 ± 0.353 <sup>b</sup>  | 9.888 ± 0.074 <sup>a</sup>  | 9.184 ± 0.090 <sup>b</sup>  |
|                      | Total           | 11.017 ± 0.445 <sup>b</sup> | 11.710 ± 0.057 <sup>a</sup> | 11.018 ± 0.073 <sup>b</sup> |
| Sweet amino acid     | Thr             | 0.450 ± 0.023 <sup>b</sup>  | 0.556 ± 0.005 <sup>a</sup>  | 0.558 ± 0.006 <sup>a</sup>  |
|                      | Ser             | 2.843 ± 0.260 <sup>a</sup>  | 2.114 ± 0.025 <sup>b</sup>  | 1.317 ± 0.053 <sup>c</sup>  |
|                      | Gly             | 0.036 ± 0.001 <sup>c</sup>  | 0.129 ± 0.010 <sup>a</sup>  | 0.087 ± 0.007 <sup>b</sup>  |
|                      | Ala             | 0.222 ± 0.021 <sup>a</sup>  | 0.059 ± 0.016 <sup>b</sup>  | 0.058 ± 0.015 <sup>b</sup>  |
|                      | Total           | 3.552 ± 0.282 <sup>a</sup>  | 2.857 ± 0.007 <sup>b</sup>  | 2.021 ± 0.064 <sup>c</sup>  |
| Bitter amino acid    | His             | 4.120 ± 0.281 <sup>b</sup>  | 5.227 ± 0.075 <sup>a</sup>  | 5.182 ± 0.062 <sup>a</sup>  |
|                      | Val             | 0.139 ± 0.009 <sup>a</sup>  | 0 <sup>b</sup>              | 0 <sup>b</sup>              |
|                      | Ile             | 0.148 ± 0.011 <sup>a</sup>  | 0 <sup>b</sup>              | 0 <sup>b</sup>              |
|                      | Leu             | 0.118 ± 0.014 <sup>a</sup>  | 0 <sup>b</sup>              | 0 <sup>b</sup>              |
|                      | Arg             | 0.179 ± 0.012 <sup>a</sup>  | 0.075 ± 0.001 <sup>a</sup>  | 0.163 ± 0.117 <sup>a</sup>  |
|                      | Phe             | 0.444 ± 0.072 <sup>a</sup>  | 0.073 ± 0.003 <sup>b</sup>  | 0.042 ± 0.037 <sup>b</sup>  |
|                      | Total           | 5.148 ± 0.298 <sup>a</sup>  | 5.375 ± 0.077 <sup>a</sup>  | 5.387 ± 0.203 <sup>a</sup>  |
| Tasteless amino acid | Cys             | 0 <sup>b</sup>              | 0.060 ± 0.008 <sup>a</sup>  | 0.004 ± 0.008 <sup>b</sup>  |
|                      | Tyr             | 0.212 ± 0.010 <sup>a</sup>  | 0 <sup>b</sup>              | 0 <sup>b</sup>              |
|                      | Lys             | 0.270 ± 0.010 <sup>a</sup>  | 0.210 ± 0.002 <sup>b</sup>  | 0.207 ± 0.027 <sup>b</sup>  |
|                      | Total           | 0.482 ± 0.017 <sup>a</sup>  | 0.270 ± 0.010 <sup>b</sup>  | 0.211 ± 0.031 <sup>c</sup>  |
| Total                |                 | 20.199 ± 0.899 <sup>a</sup> | 20.213 ± 0.039 <sup>a</sup> | 18.170 ± 1.026 <sup>b</sup> |

Note: unit: mg/100 mL; different lowercase letters represented statistically significant differences between groups ( $P < 0.05$ ).



**Table S8** Detailed information of differential metabolites between UFT and LFT groups.

| Retention time (min) | Metabolites                                 | Mass     | m/z      | Adducts             | MS/MS              | Formula                                                       | VIP   | FC         | Trend | <i>P</i> | CAS         |
|----------------------|---------------------------------------------|----------|----------|---------------------|--------------------|---------------------------------------------------------------|-------|------------|-------|----------|-------------|
| 16.213               | Capsiate                                    | 306.1839 | 307.191  | [M+H] <sup>+</sup>  | 289.1802, 261.1841 | C <sub>18</sub> H <sub>26</sub> O <sub>4</sub>                | 1.36  | 2.05       | ↑     | ***      | 205687-01-0 |
| 21.205               | [7]-Paradol                                 | 292.2033 | 293.2106 | [M+H] <sup>+</sup>  | 135.0798, 69.0684  | C <sub>18</sub> H <sub>28</sub> O <sub>3</sub>                | 1.28  | 77109.17   | ↓     | ***      | 53172-04-6  |
| 5.381                | trans-p-Coumaric acid 4-glucoside           | 326.1003 | 349.0892 | [M+Na] <sup>+</sup> | 291.0496, 185.0435 | C <sub>15</sub> H <sub>18</sub> O <sub>8</sub>                | 1.47  | 12.04      | ↓     | ***      | 14364-05-7  |
| 2.724                | p-Hydroxycinnamaldehyde                     | 148.0522 | 149.0593 | [M+H] <sup>+</sup>  | 121.0267, 103.0539 | C <sub>9</sub> H <sub>8</sub> O <sub>2</sub>                  | 1.81  | 2.06       | ↓     | ***      | 2538-87-6   |
| 5.092                | Chlorogenic acid                            | 354.0963 | 353.0889 | [M-H] <sup>-</sup>  | 191.0564, 59.0137  | C <sub>16</sub> H <sub>18</sub> O <sub>9</sub>                | 2.00  | 14.28      | ↑     | ***      | 327-97-9    |
| 4.181                | Irisflorentin                               | 386.0997 | 385.0922 | [M-H] <sup>-</sup>  | 191.9471, 126.5486 | C <sub>20</sub> H <sub>18</sub> O <sub>8</sub>                | 1.67  | 20.80      | ↑     | ***      | 41743-73-1  |
| 4.776                | Tiliroside                                  | 594.1358 | 593.1285 | [M-H] <sup>-</sup>  | 346.9605, 280.7779 | C <sub>30</sub> H <sub>26</sub> O <sub>13</sub>               | 1.47  | 12.56      | ↑     | ***      | 20316-62-5  |
| 7.858                | Homoeriodictyol                             | 302.0796 | 301.0723 | [M-H] <sup>-</sup>  | 214.8608, 189.0197 | C <sub>16</sub> H <sub>14</sub> O <sub>6</sub>                | 1.69  | 13.11      | ↑     | ***      | 446-71-9    |
| 2.792                | Cryptomeridiol 11-rhamnoside                | 386.265  | 387.2723 | [M+H] <sup>+</sup>  | 339.1546, 158.9257 | C <sub>21</sub> H <sub>38</sub> O <sub>6</sub>                | 3.86  | 34.32      | ↓     | ***      | 349112-30-7 |
| 8.577                | Tuliposide B                                | 294.096  | 295.103  | [M+H] <sup>+</sup>  | 207.0267, 149.0208 | C <sub>11</sub> H <sub>18</sub> O <sub>9</sub>                | 1.71  | 5.25       | ↓     | ***      | 19870-33-8  |
| 14.854               | Isopetasoside                               | 396.2133 | 395.207  | [M-H] <sup>-</sup>  | 327.2203, 192.9570 | C <sub>21</sub> H <sub>32</sub> O <sub>7</sub>                | 1.62  | 356471.33  | ↓     | ***      | 69809-29-6  |
| 24.392               | Dibutyl phthalate                           | 278.1526 | 279.1598 | [M+H] <sup>+</sup>  | 149.0238, 121.0296 | C <sub>16</sub> H <sub>22</sub> O <sub>4</sub>                | 1.93  | 687300.50  | ↑     | ***      | 84-74-2     |
| 11.1                 | Tetrahydrofurfuryl butyrate                 | 172.1101 | 171.1028 | [M-H] <sup>-</sup>  | 86.9752, 68.9965   | C <sub>9</sub> H <sub>16</sub> O <sub>3</sub>                 | 1.58  | 12.29      | ↓     | ***      | 92345-48-7  |
| 24.385               | 12-Hydroxy-8,10-octadecadienoic acid        | 296.2357 | 297.2431 | [M+H] <sup>+</sup>  | 95.0500, 81.0700   | C <sub>18</sub> H <sub>32</sub> O <sub>3</sub>                | 2.37  | 27.34      | ↑     | ***      | 170171-31-0 |
| 22.675               | 4,8,12,15-Octadecatetraenoic acid           | 276.2081 | 277.2161 | [M+H] <sup>+</sup>  | 133.0991, 93.0699  | C <sub>18</sub> H <sub>28</sub> O <sub>2</sub>                | 1.66  | 3.22       | ↓     | ***      | 67329-10-6  |
| 15.49                | 3,4-Dimethyl-5-pentyl-2-furanheptanoic acid | 294.2188 | 295.226  | [M+H] <sup>+</sup>  | 165.0365, 135.0801 | C <sub>18</sub> H <sub>30</sub> O <sub>3</sub>                | 3.01  | 1681709.50 | ↑     | ***      | 92745-17-0  |
| 18.95                | γ-Linolenic acid                            | 278.2239 | 279.2311 | [M+H] <sup>+</sup>  | 135.0794, 69.0341  | C <sub>18</sub> H <sub>30</sub> O <sub>2</sub>                | 1.84  | 10.85      | ↑     | ***      | 506-26-3    |
| 15.621               | 8R-HpODE                                    | 312.2301 | 313.2374 | [M+H] <sup>+</sup>  | 141.1264, 99.0798  | C <sub>18</sub> H <sub>32</sub> O <sub>4</sub>                | 5.63  | 20.18      | ↓     | ***      | -           |
| 15.627               | 9S,12S,13S-trihydroxy-10E-octadecenoic acid | 330.2415 | 329.2342 | [M-H] <sup>-</sup>  | 197.1178, 113.0959 | C <sub>18</sub> H <sub>34</sub> O <sub>5</sub>                | 7.24  | 27.70      | ↑     | ***      | -           |
| 21.824               | 18-Oxooleate                                | 296.2357 | 295.2285 | [M-H] <sup>-</sup>  | 277.2172, 195.1372 | C <sub>18</sub> H <sub>32</sub> O <sub>3</sub>                | 2.13  | 3.72       | ↑     | ***      | -           |
| 14.705               | Traumatic acid                              | 228.1362 | 227.1293 | [M-H] <sup>-</sup>  | 209.1178, 88.9883  | C <sub>12</sub> H <sub>20</sub> O <sub>4</sub>                | 1.19  | 194055.50  | ↓     | ***      | 6402-36-4   |
| 1.489                | Malic acid                                  | 134.0217 | 133.0144 | [M-H] <sup>-</sup>  | 71.0140, 59.0134   | C <sub>4</sub> H <sub>6</sub> O <sub>5</sub>                  | 4.17  | 74.24      | ↓     | ***      | 6915-15-7   |
| 1.957                | L-Aspartic acid                             | 133.0371 | 132.0298 | [M-H] <sup>-</sup>  | 115.0017, 71.0123  | C <sub>4</sub> H <sub>7</sub> NO <sub>4</sub>                 | 1.21  | 4.02       | ↑     | ***      | 56-84-8     |
| 5.757                | Leucyl-Isoleucine                           | 244.1797 | 243.1723 | [M-H] <sup>-</sup>  | 83.0115, 68.9959   | C <sub>12</sub> H <sub>24</sub> N <sub>2</sub> O <sub>3</sub> | 1.64  | 96925.83   | ↓     | ***      | -           |
| 1.594                | N-Acryloylglycine                           | 129.0426 | 130.0499 | [M+H] <sup>+</sup>  | 84.0439, 56.0490   | C <sub>5</sub> H <sub>7</sub> NO <sub>3</sub>                 | 11.06 | 3.87       | ↑     | ***      | 24599-25-5  |

**Table S9** Concentrations of different phenolic compounds in different samples measured by UPLC-QQQ-MS.

| Phenolic compound     | UFT            | LFT              | SFT             |
|-----------------------|----------------|------------------|-----------------|
| Chlorogenic acid (CA) | 62.451 ± 3.741 | 570.394 ± 21.246 | 151.511 ± 1.722 |
| Capsiate (CS)         | 0.497 ± 0.010  | 0.891 ± 0.024    | 0.738 ± 0.049   |
| Tilioside (TR)        | 0.480 ± 0.008  | 2.230 ± 0.034    | 1.691 ± 0.065   |
| Irisfloreantin (IF)   | 0.161 ± 0.024  | 4.104 ± 0.255    | 0.165 ± 0.010   |
| Homoeriodictyol (HE)  | 1.888 ± 0.301  | 12.606 ± 0.533   | 9.607 ± 1.821   |

Note: unit:  $\mu\text{g/g}$ ; different lowercase letters represented statistically significant differences between groups ( $P < 0.05$ ).

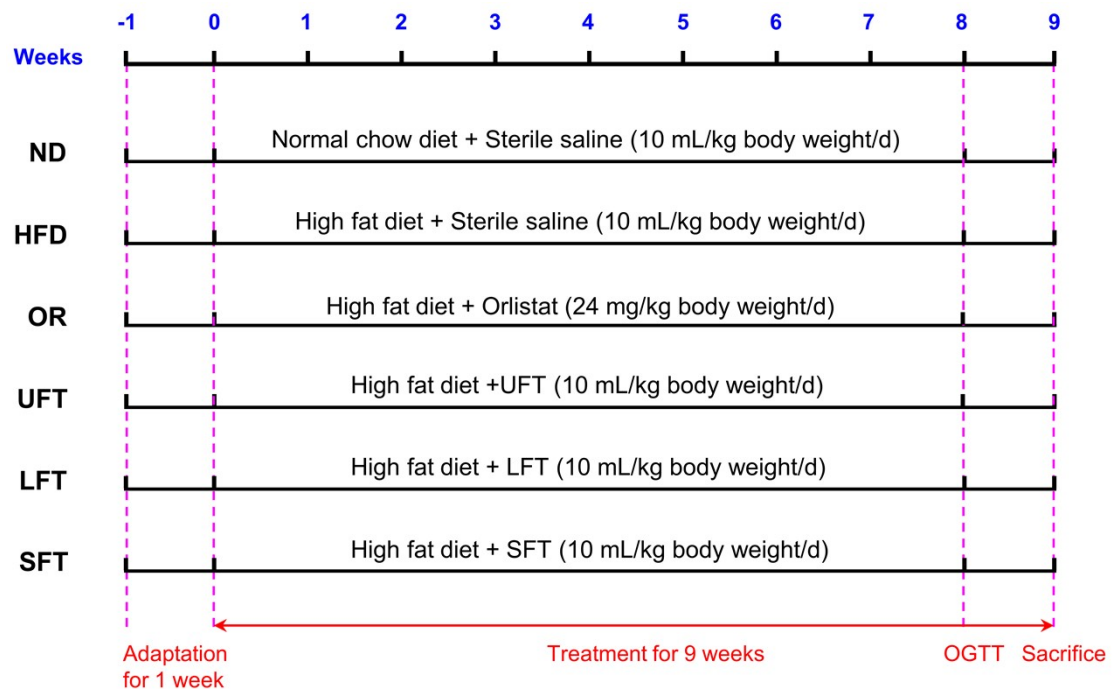

**Fig. S1** The treatment flow chart of animal experiment design.

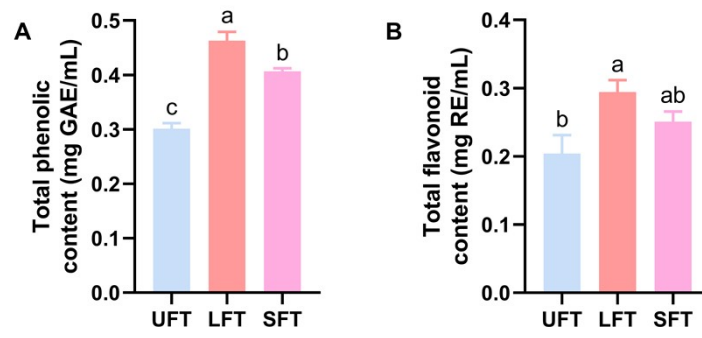

**Fig. S2** Total phenolic content and total flavonoid content of tomato before and after fermentation.

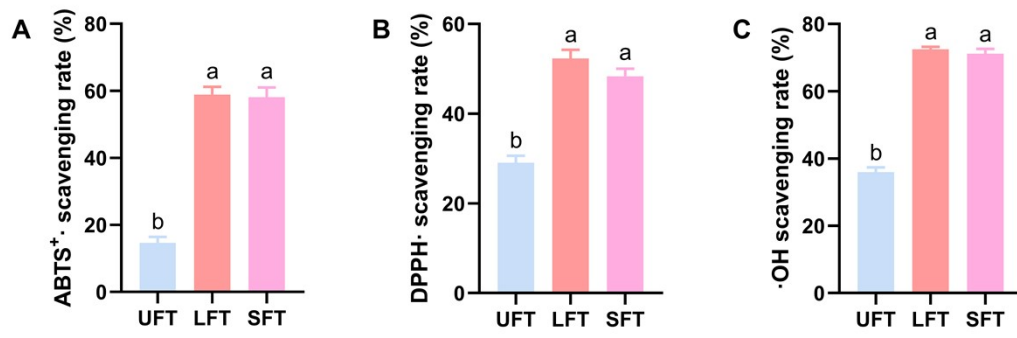

**Fig. S3** Changes in antioxidant activities of tomato before and after fermentation.

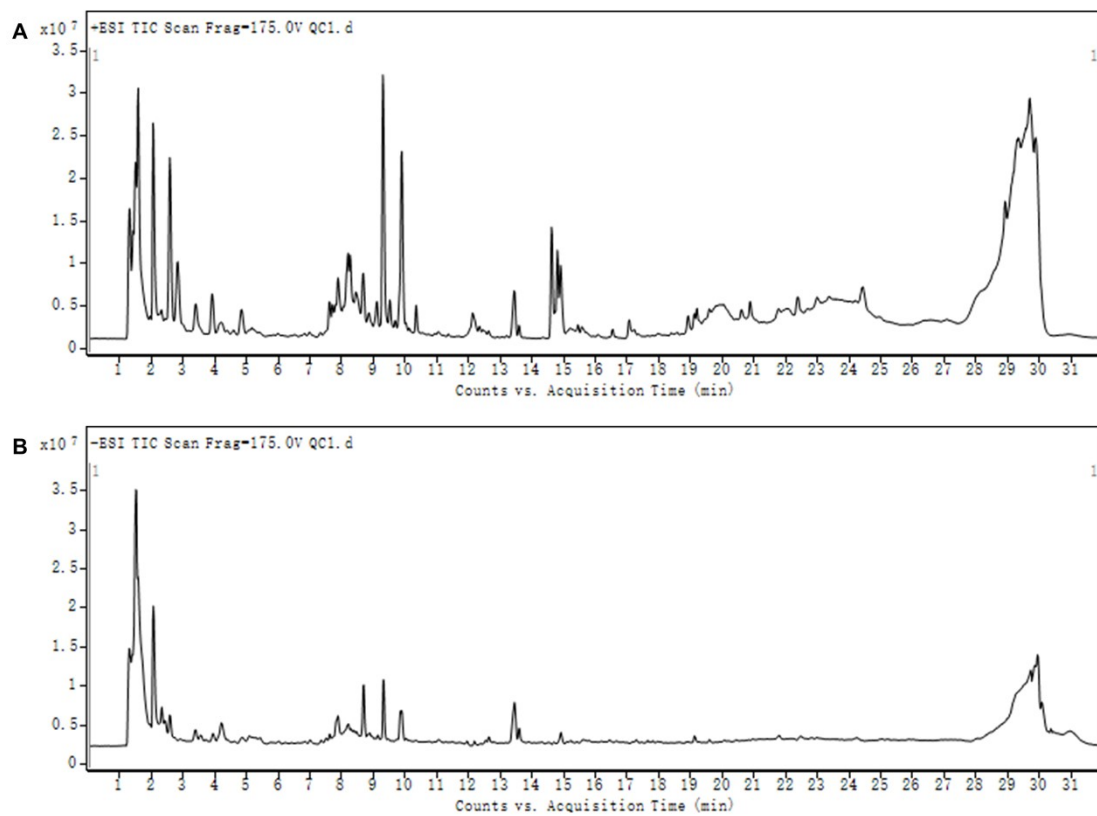

**Fig. S4** Total ion chromatogram (TIC) of the QC sample in (A) positive ion mode and (B) negative ion mode.

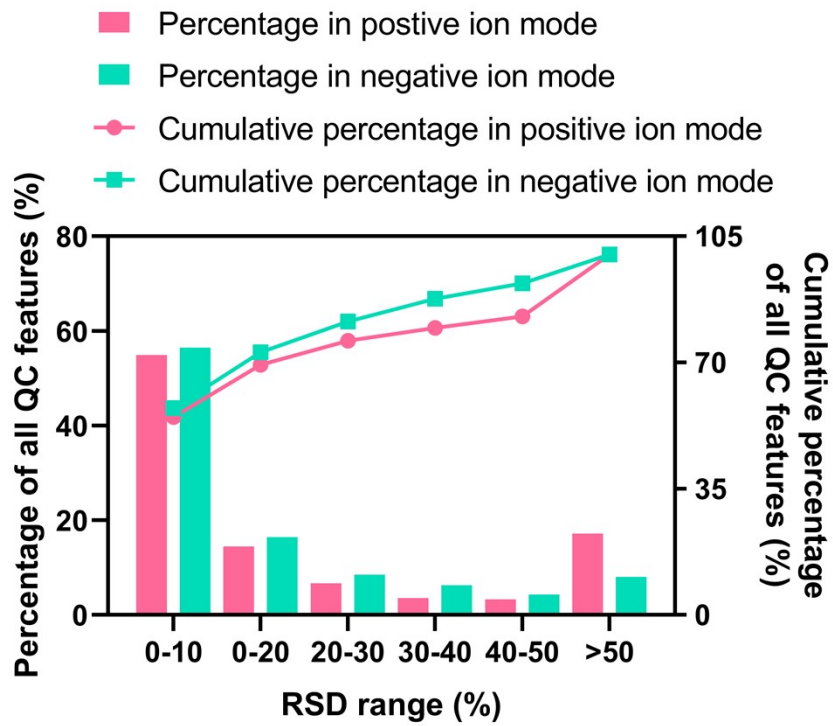

**Fig. S5** Relative standard deviation (RSD) distribution of ion features in QC sample.
